# Supplementary material for: Biological and Clinical Factors Contributing to the Metabolic Heterogeneity of Hospitalized Patients with and without COVID-19
Source: Cells. 2021 Sep 2;10(9):2293. doi: 10.3390/cells10092293 (PMC8467961; doi:10.3390/cells10092293)
Supplement: Supplementary file 1 [file cells-10-02293-s001.zip › Supplementary Figures.pdf]

# SUPPLEMENTARY MATERIAL

## TABLE OF CONTENTS

|                                                                                       |             |
|---------------------------------------------------------------------------------------|-------------|
| <b>SUPPLEMENTARY FIGURES.....</b>                                                     | <b>2</b>    |
| <i>SUPPLEMENTARY FIGURE s1 .....</i>                                                  | <i>2</i>    |
| <i>SUPPLEMENTARY FIGURE s2 .....</i>                                                  | <i>3</i>    |
| <i>SUPPLEMENTARY FIGURE s3 .....</i>                                                  | <i>5</i>    |
| <i>SUPPLEMENTARY FIGURE s4 .....</i>                                                  | <i>6</i>    |
| <i>SUPPLEMENTARY FIGURE s5 .....</i>                                                  | <i>8</i>    |
| <i>SUPPLEMENTARY FIGURE s6 .....</i>                                                  | <i>9</i>    |
| <i>SUPPLEMENTARY FIGURE s7 .....</i>                                                  | <i>11</i>   |
| <i>SUPPLEMENTARY FIGURE s8 .....</i>                                                  | <i>12</i>   |
| <i>SUPPLEMENTARY FIGURE s9 .....</i>                                                  | <i>13</i>   |
| <i>SUPPLEMENTARY FIGURE s10.....</i>                                                  | <i>14</i>   |
| <i>SUPPLEMENTARY FIGURE s11.....</i>                                                  | <i>15</i>   |
| <i>SUPPLEMENTARY FIGURE s12.....</i>                                                  | <i>16</i>   |
| <i>SUPPLEMENTARY FIGURE s13.....</i>                                                  | <i>17</i>   |
| <i>SUPPLEMENTARY FIGURE s14.....</i>                                                  | <i>18</i>   |
| <i>SUPPLEMENTARY FIGURE s15.....</i>                                                  | <i>19</i>   |
| <i>SUPPLEMENTARY FIGURE s16.....</i>                                                  | <i>20</i>   |
| <b>SUPPLEMENTARY DATA TABLE (PLEASE REFER TO “LEGEND” SHEET WITHIN THE FILE).....</b> | <b>XLSX</b> |

***SUPPLEMENTARY FIGURES***

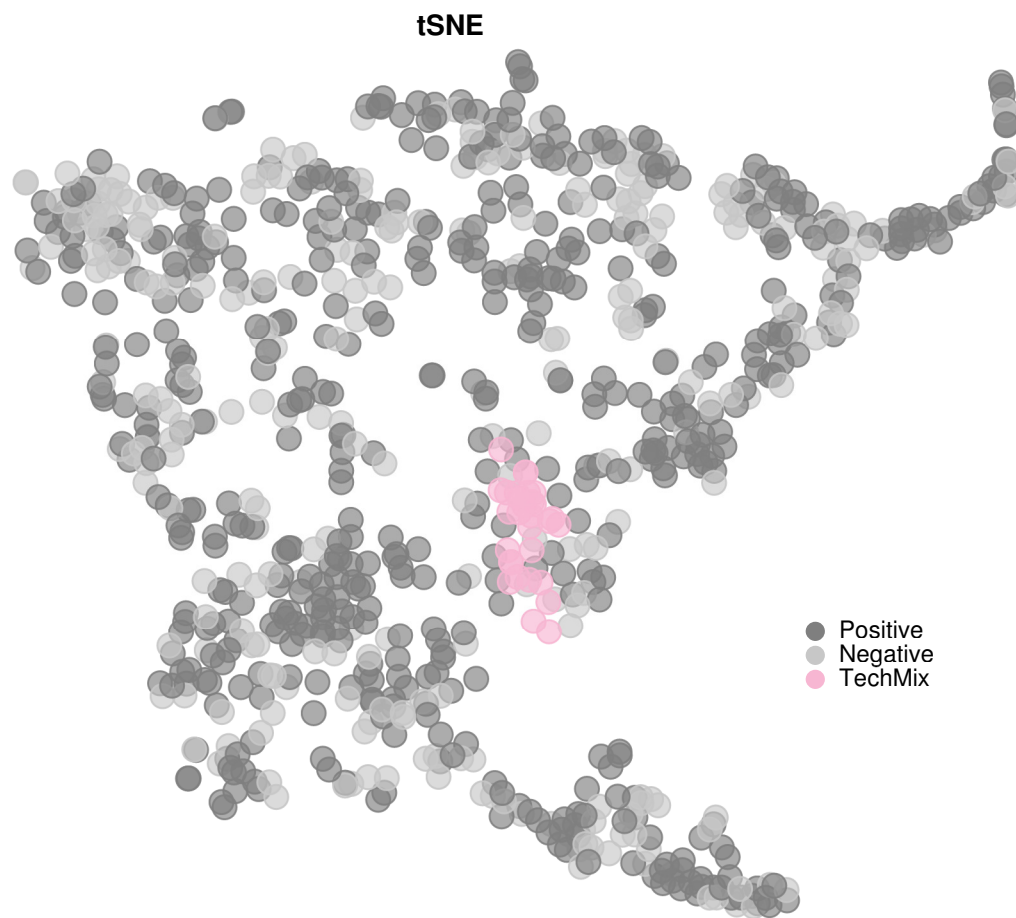

**Supplementary Figure S1 – tSNE Analysis of Metabolomics data confirms quality of the analysis, with technical mixes clustering together (pink).**

Impact of IL-6

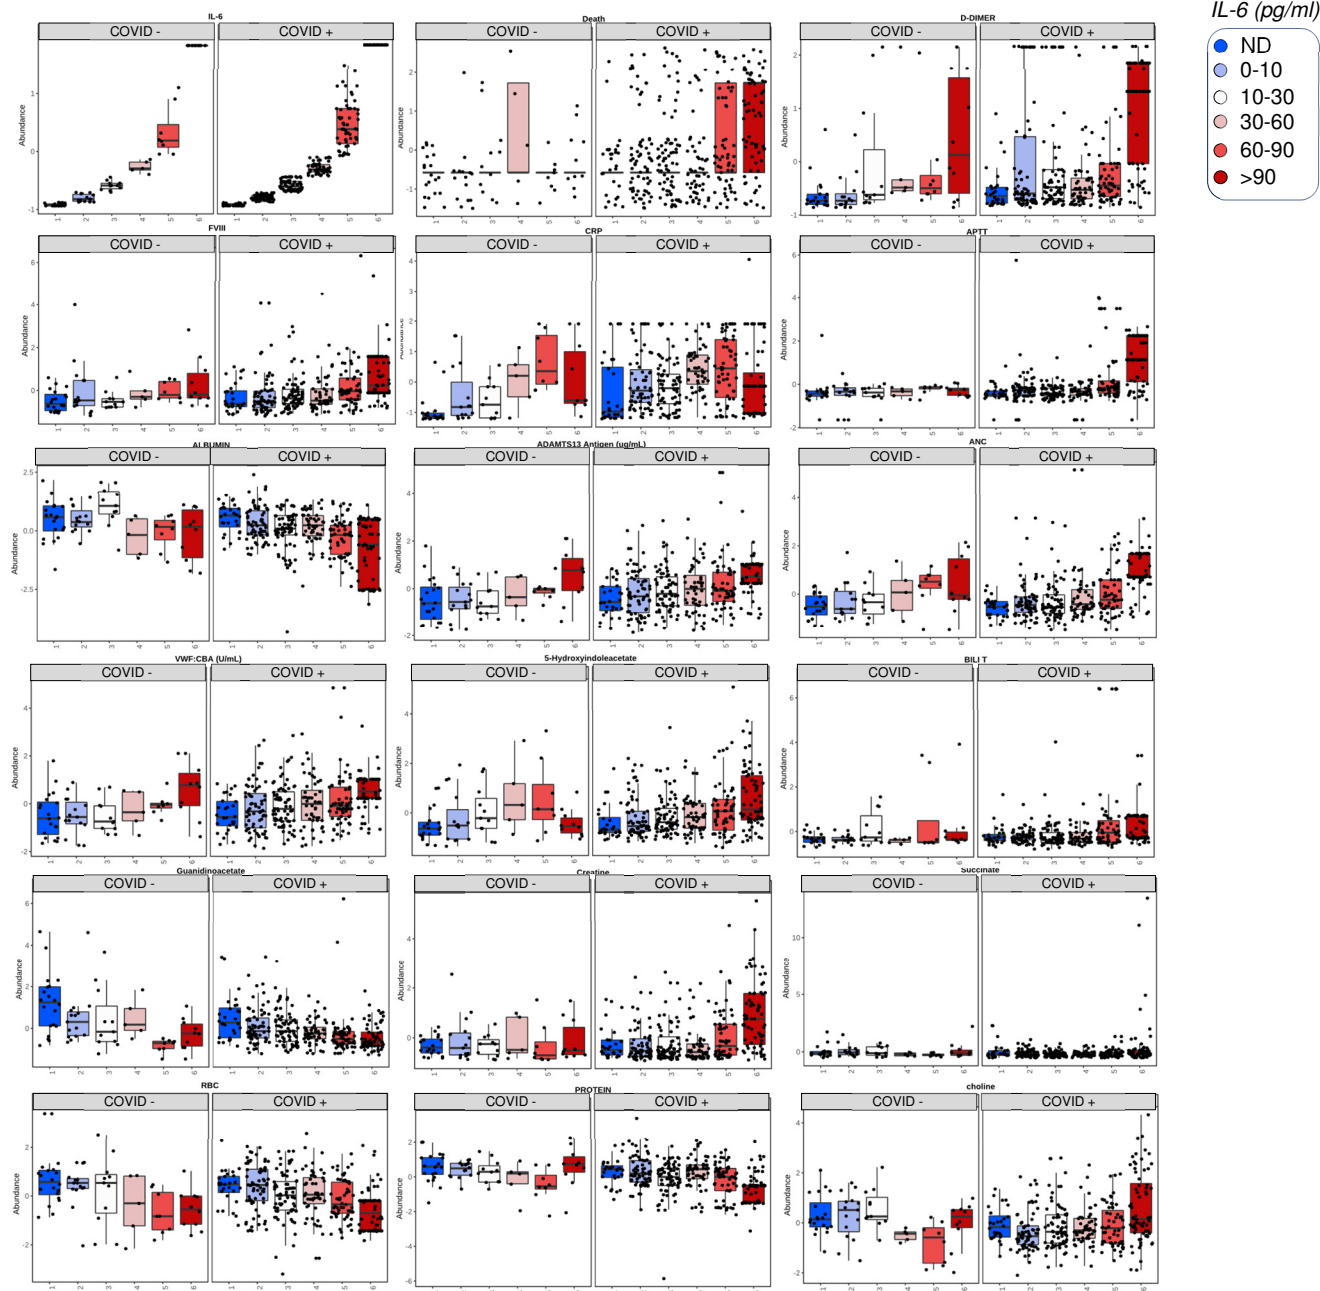

continues →

# Impact of IL-6

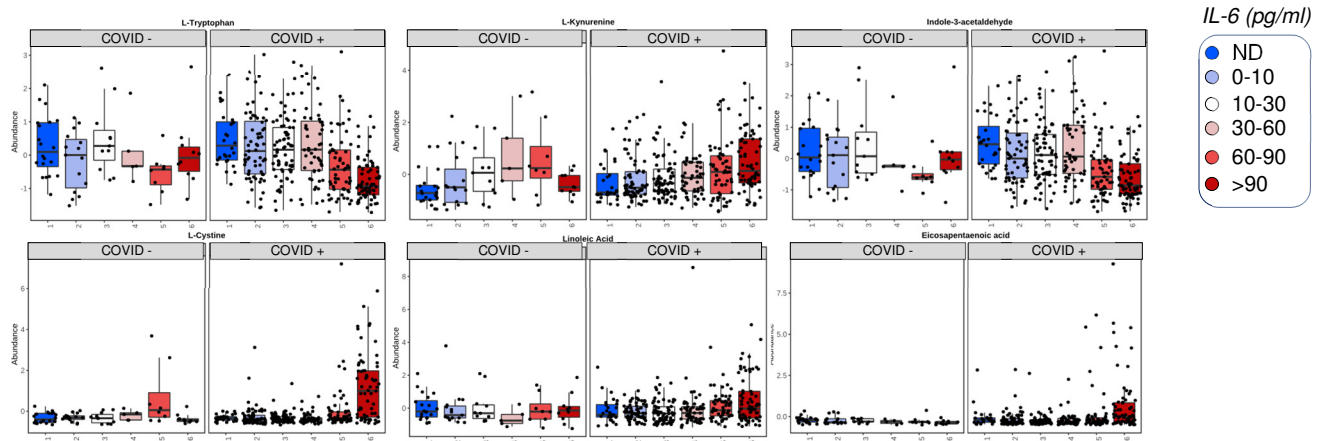

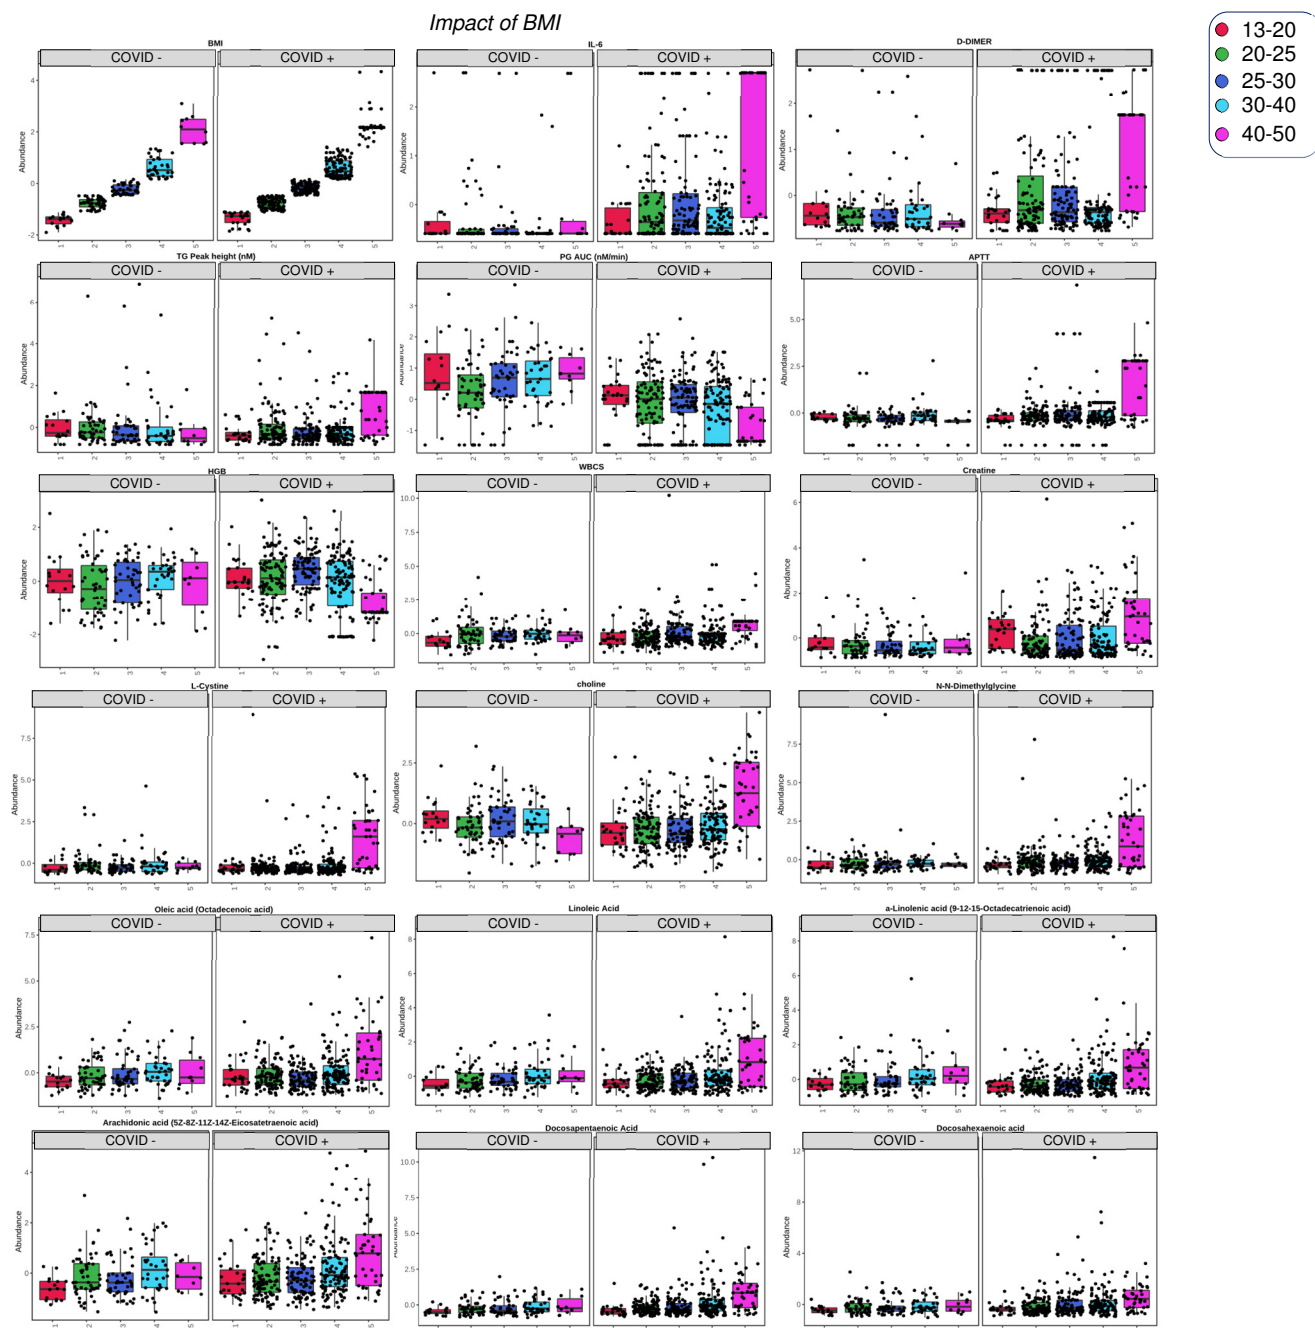

**Supplementary Figure S3 – Markers of BMI in COVID negative (-) and positive (+) patients, as determined by Two-way ANOVA.**

# Impact of Age

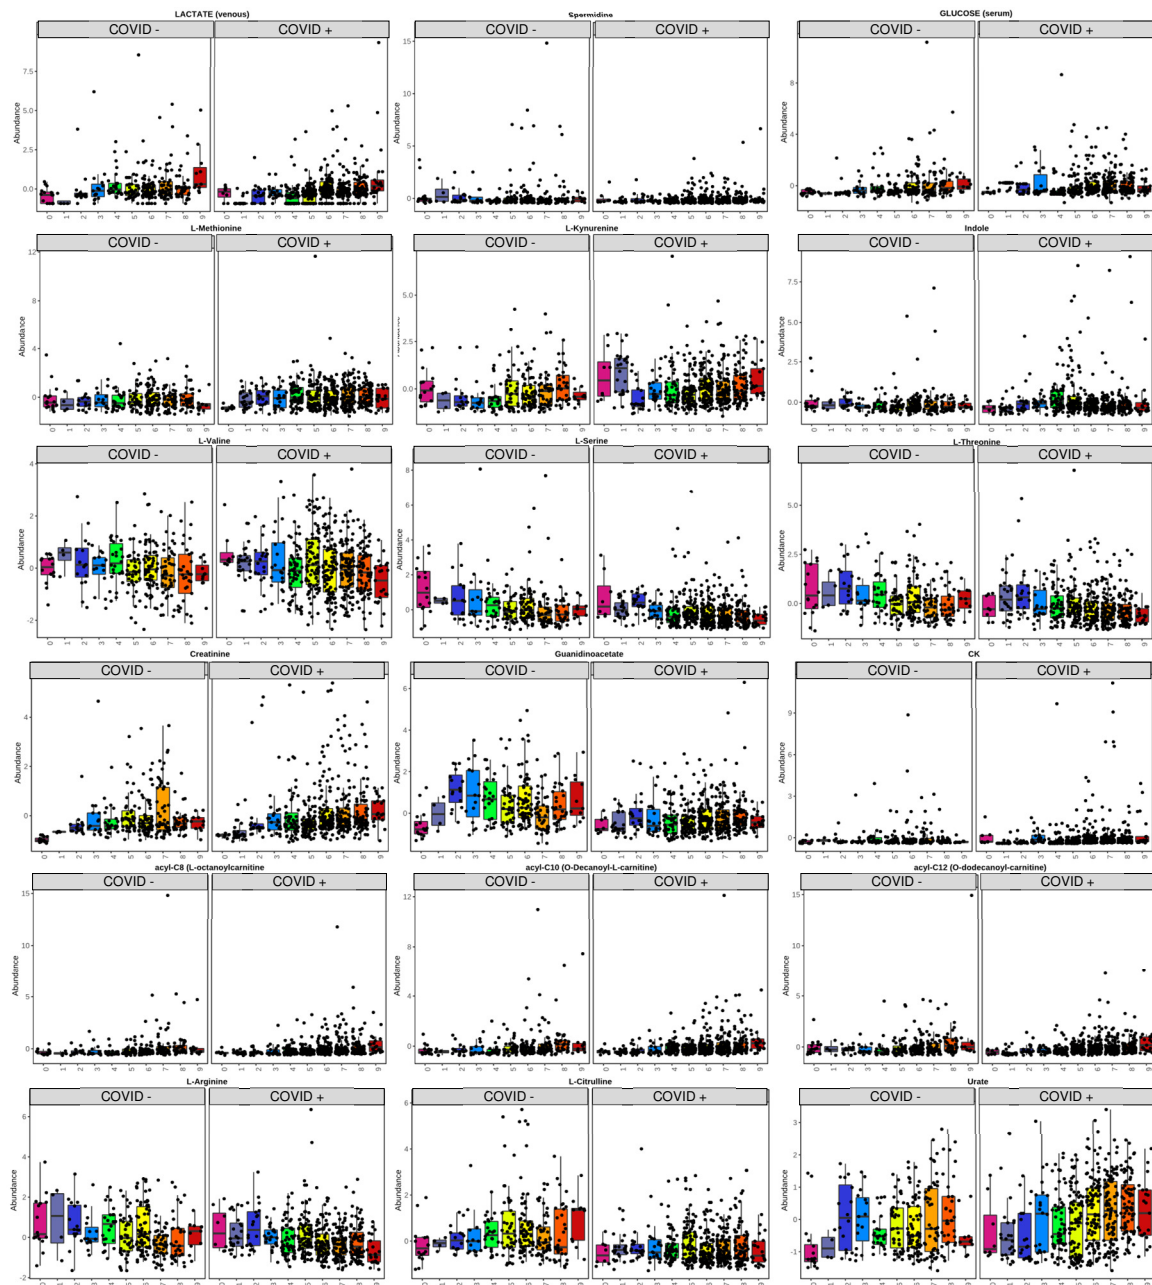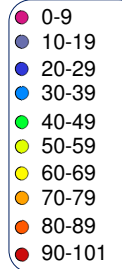

continues →

# Impact of Age

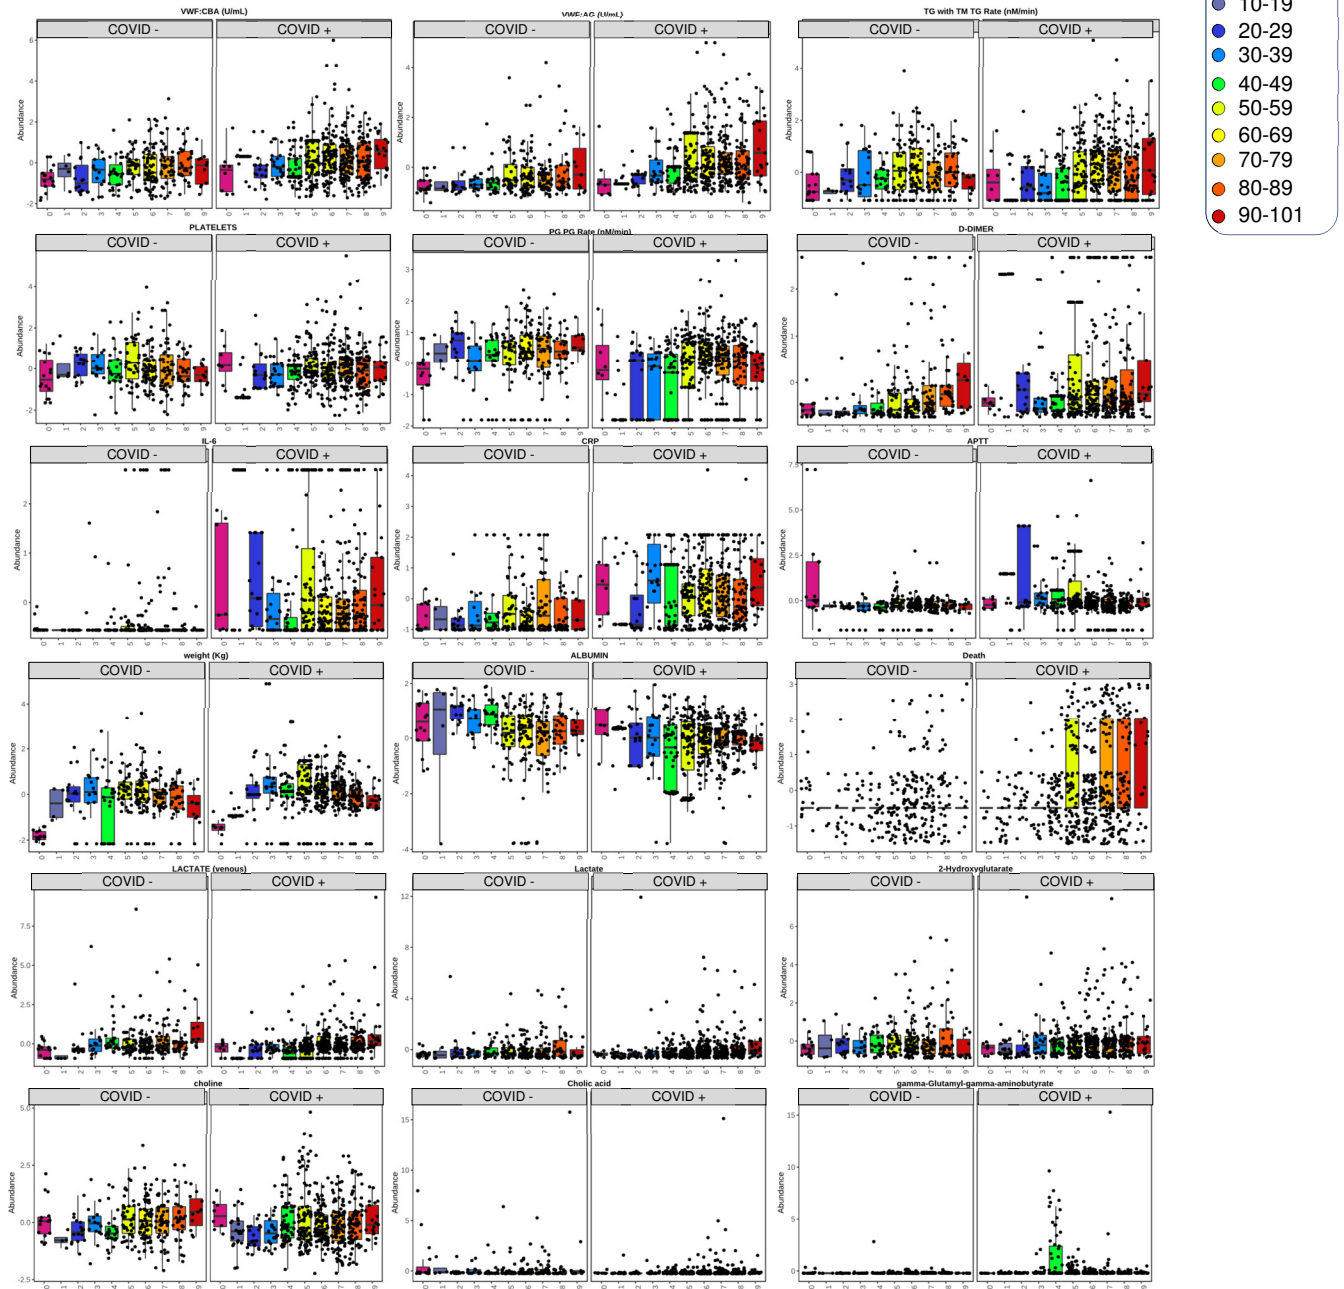

**Supplementary Figure S4 – Markers of age in COVID negative (-) and positive (+) patients, as determined by Two-way ANOVA.**

# Impact of Sex

Female  
Male

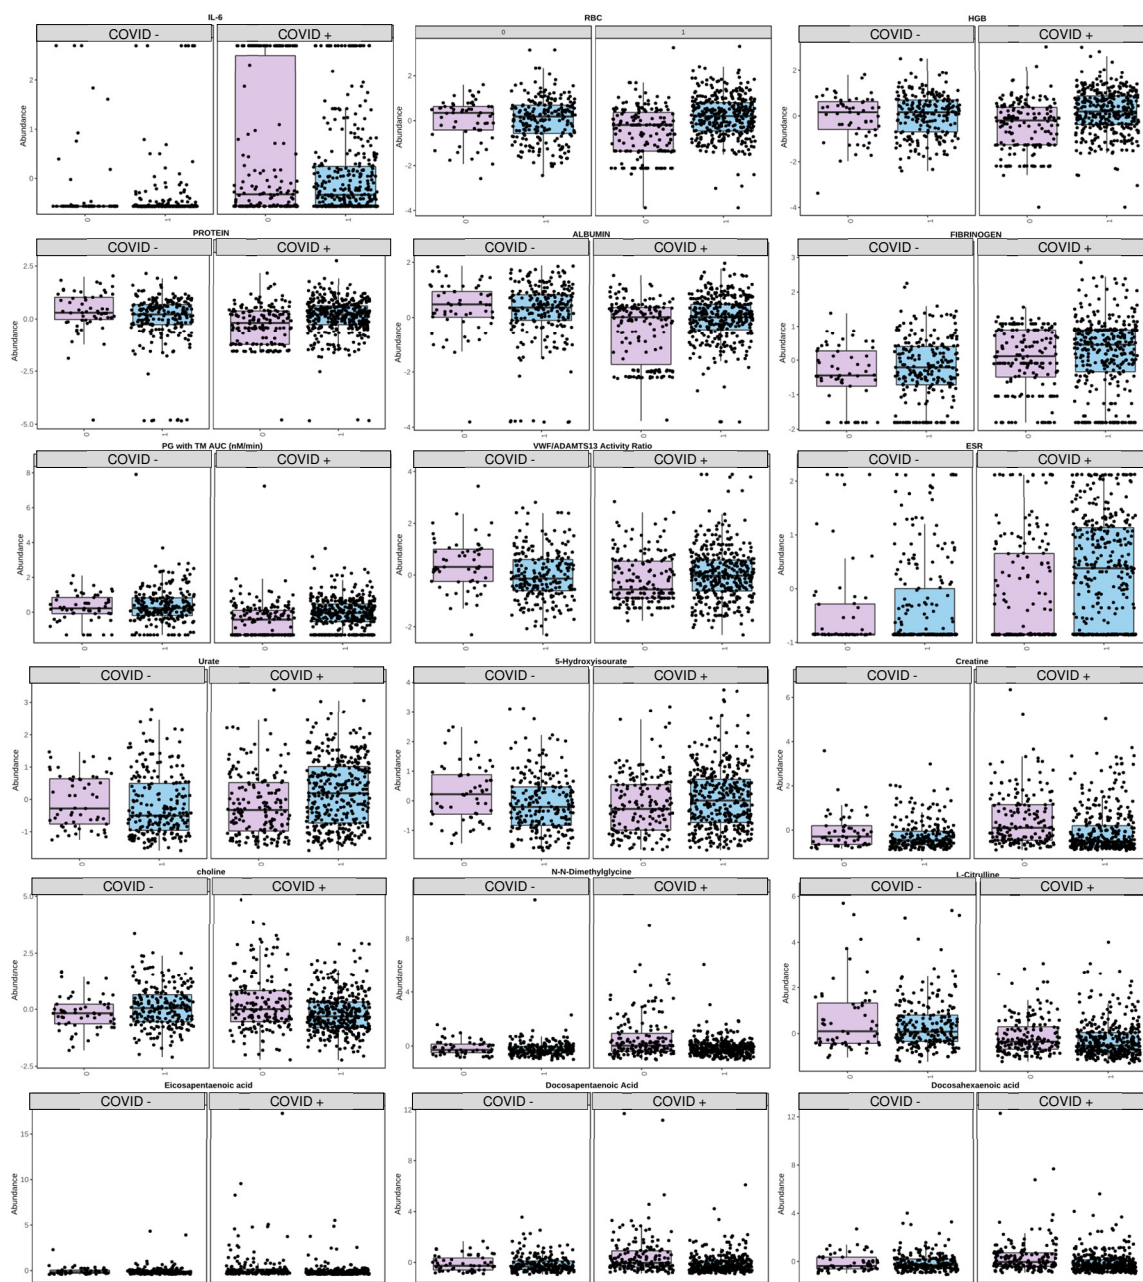

**Supplementary Figure S5 – Markers of sex in COVID negative (-) and positive (+) patients, as determined by Two-way ANOVA (0 = female; 1 = male).**

Impact of RBC counts ( $1 \times 10^6/\mu\text{l}$ )

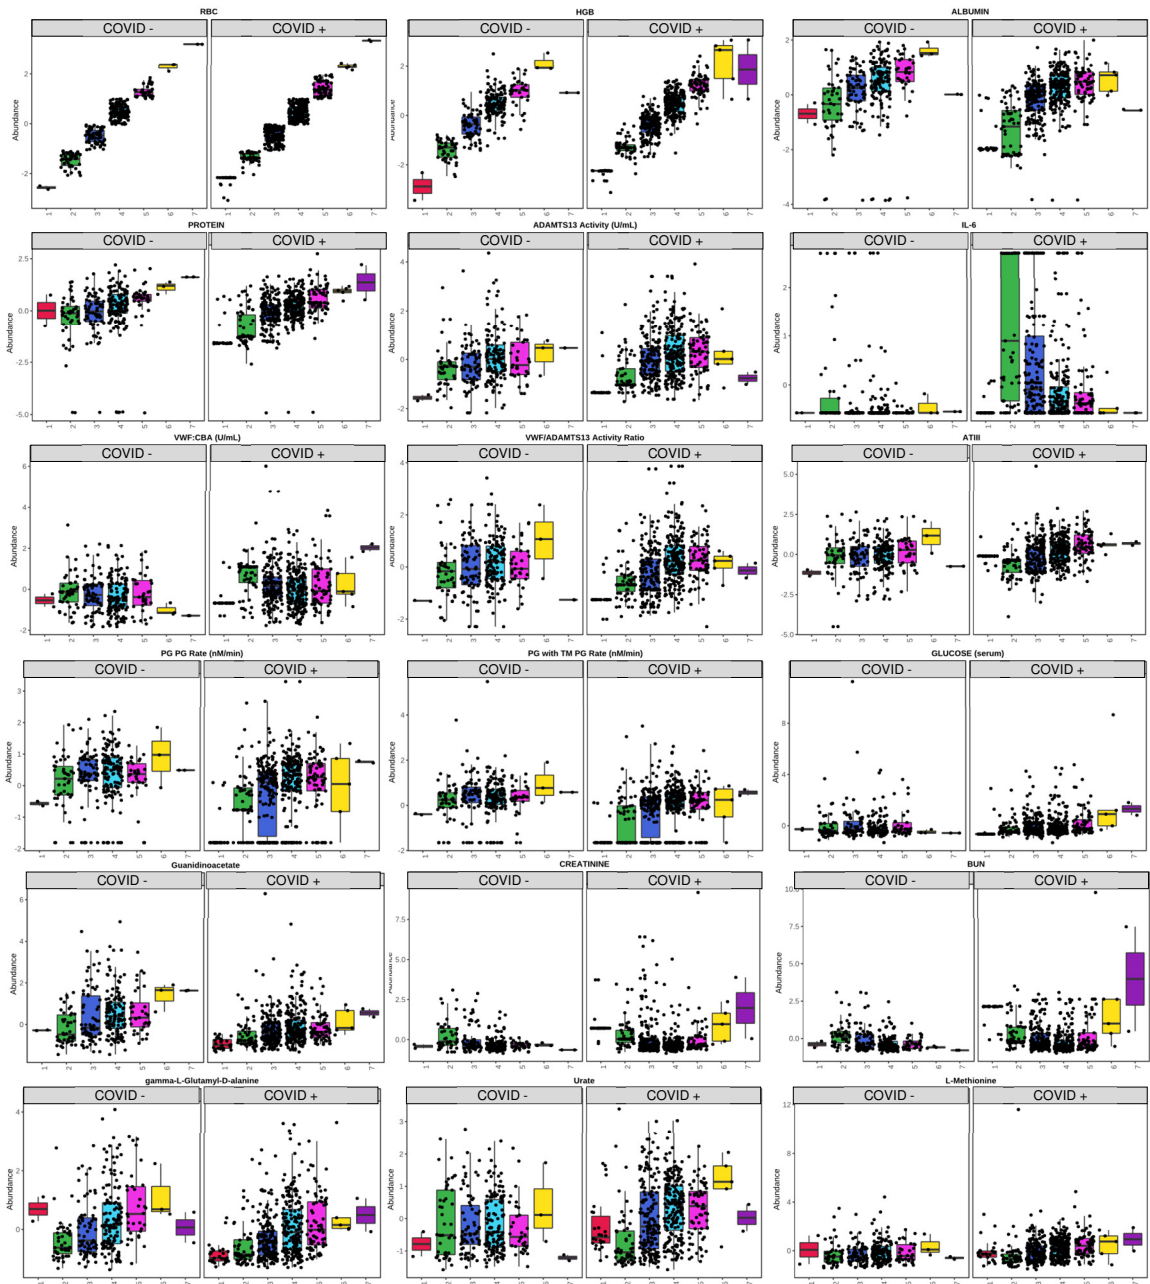

continues →

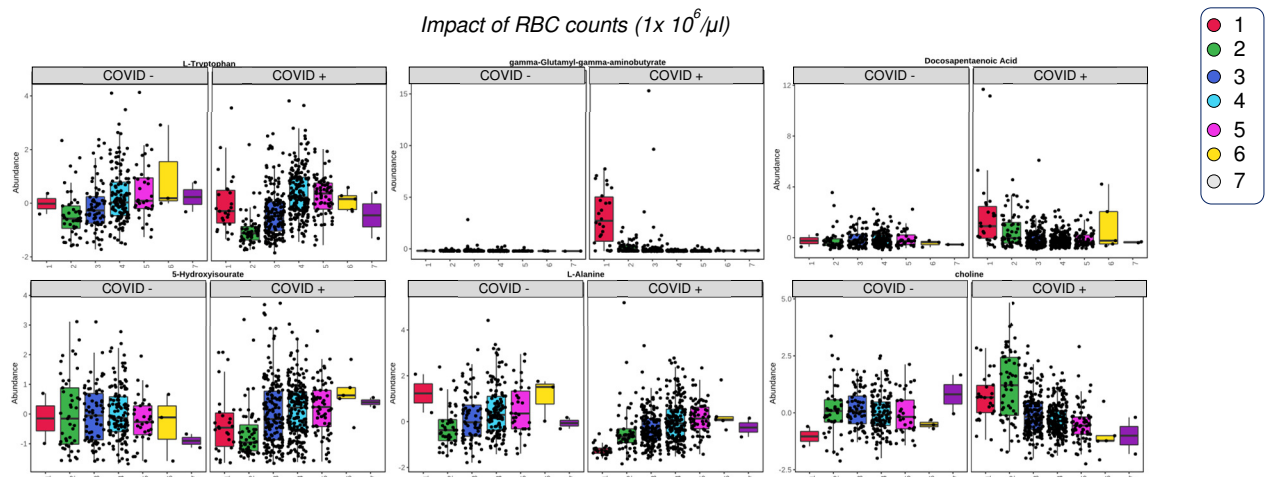

**Supplementary Figure S6 – Markers of RBC counts in COVID negative (-) and positive (+) patients, as determined by Two-way ANOVA (numbers in the legend indicate RBC count in millions per microliter).**

# Impact of Race

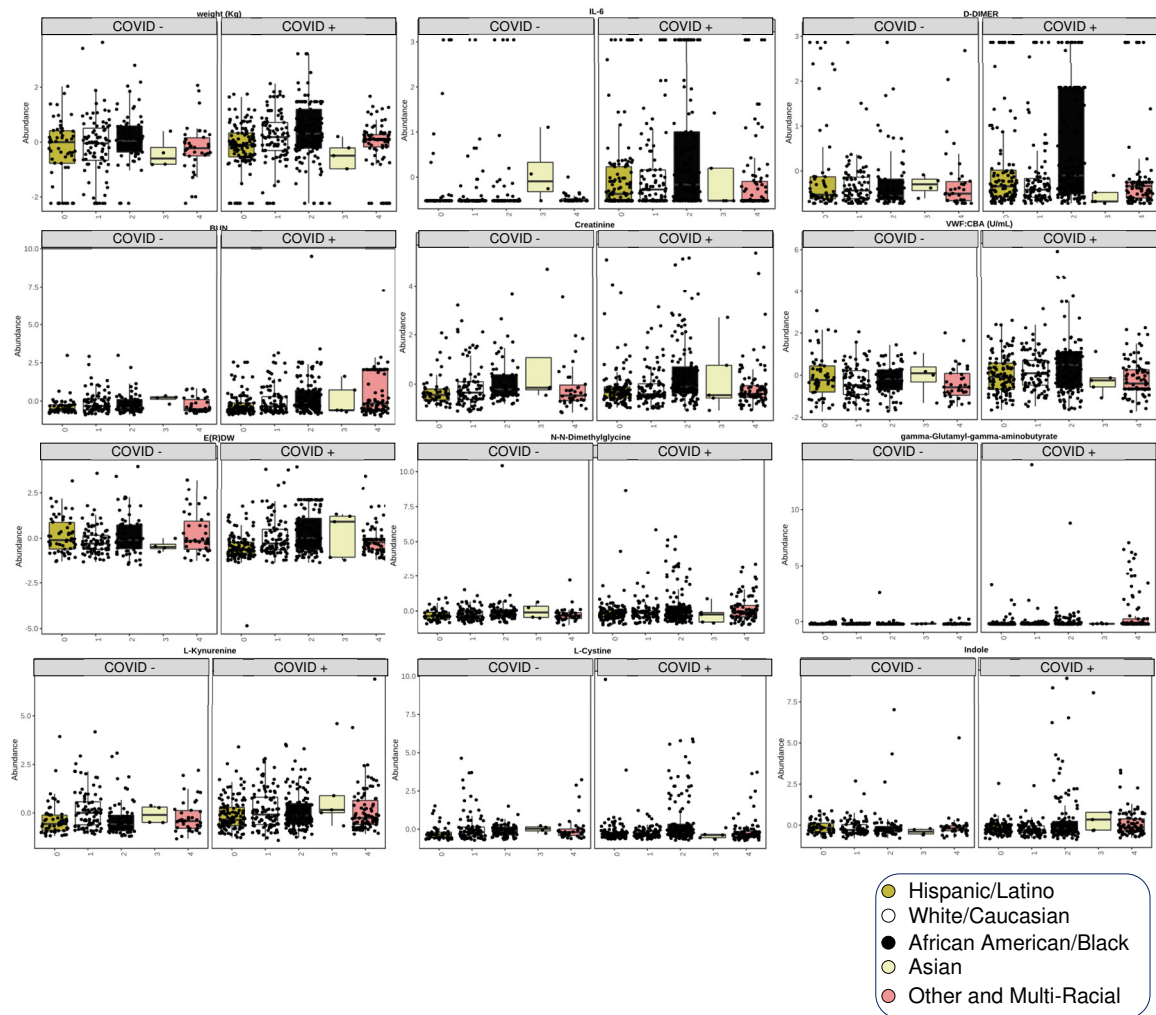

**Supplementary Figure S7 – Markers of race in COVID negative (-) and positive (+) patients, as determined by Two-way ANOVA.**

# Impact of Blood Group

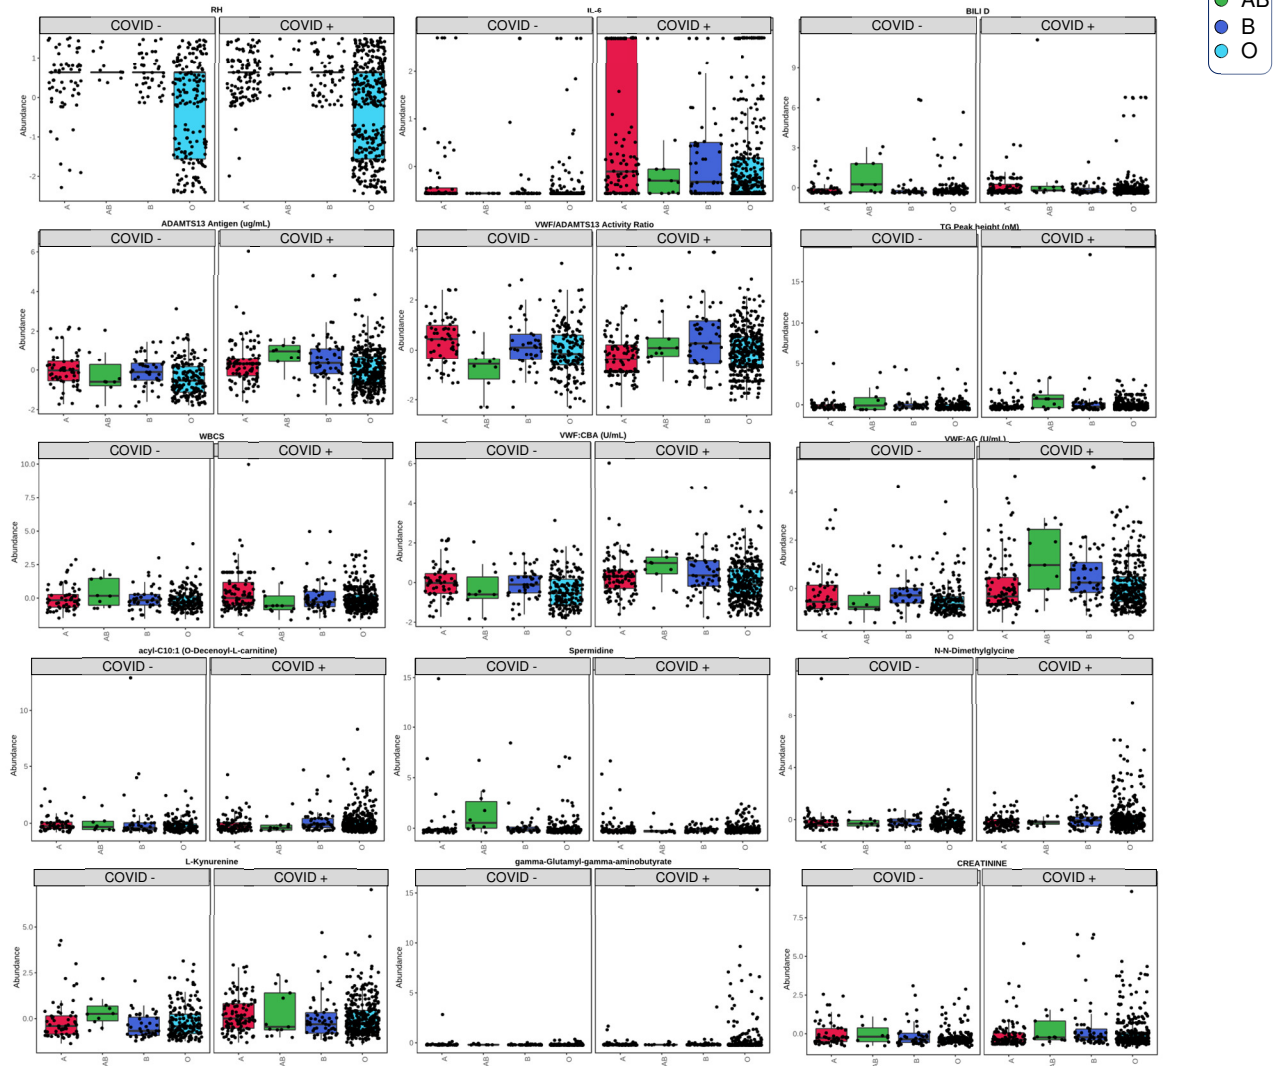

**Supplementary Figure S8 – Markers of blood group in COVID negative (-) and positive (+) patients, as determined by Two-way ANOVA.**

### Markers of mortality

○ Survived  
● Deceased

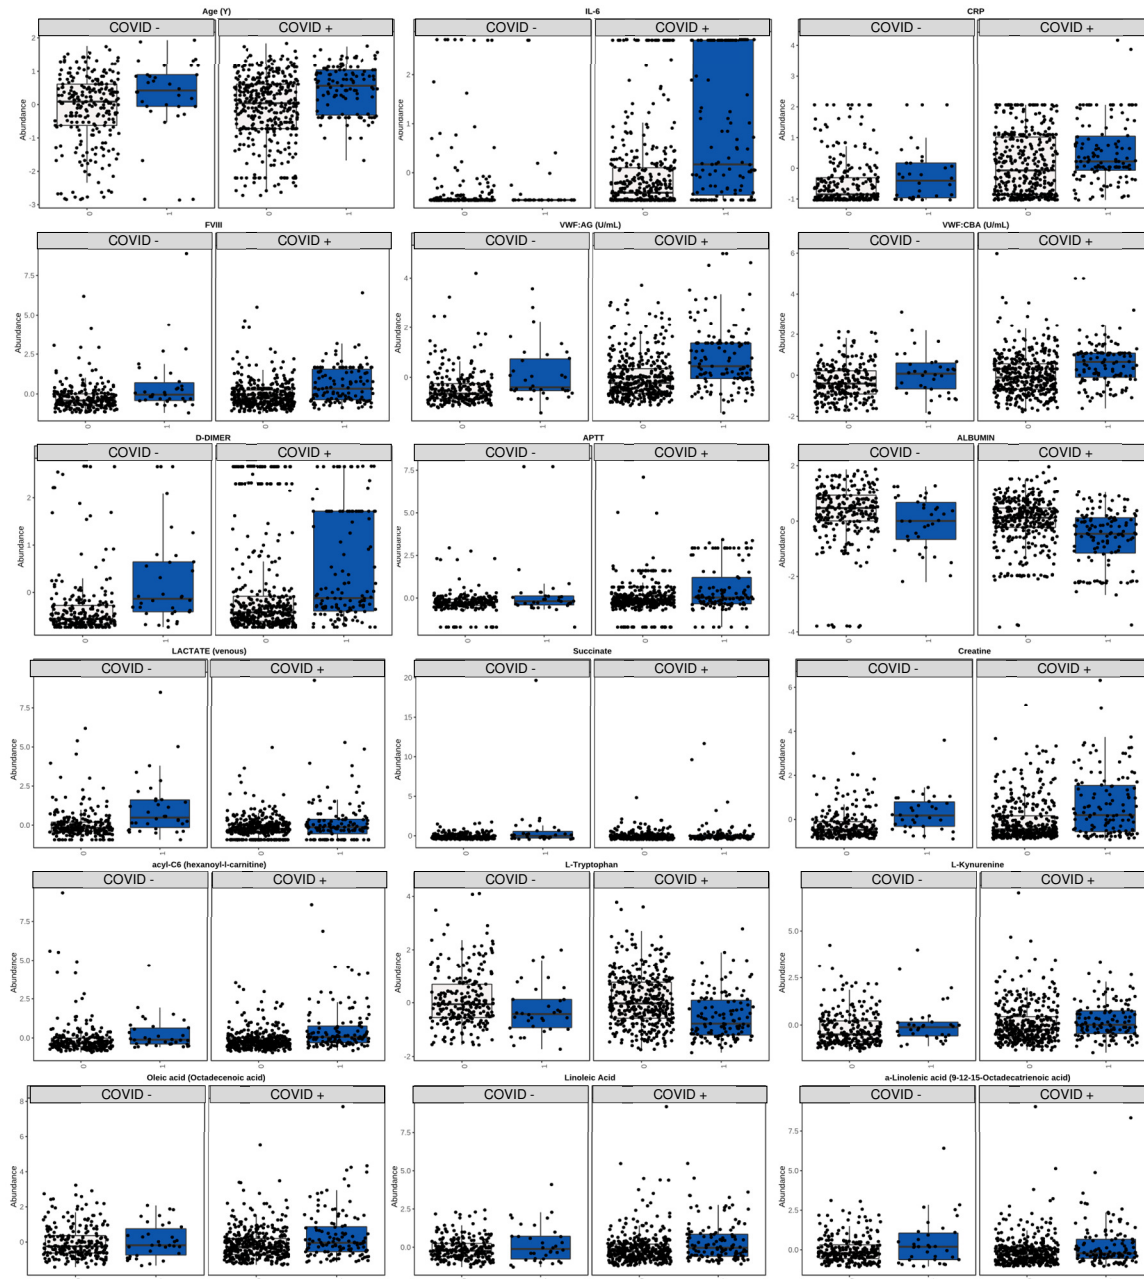

**Supplementary Figure S9 – Markers of mortality in COVID negative (-) and positive (+) patients, as determined by Two-way ANOVA (0 = survived; 1 = dead).**

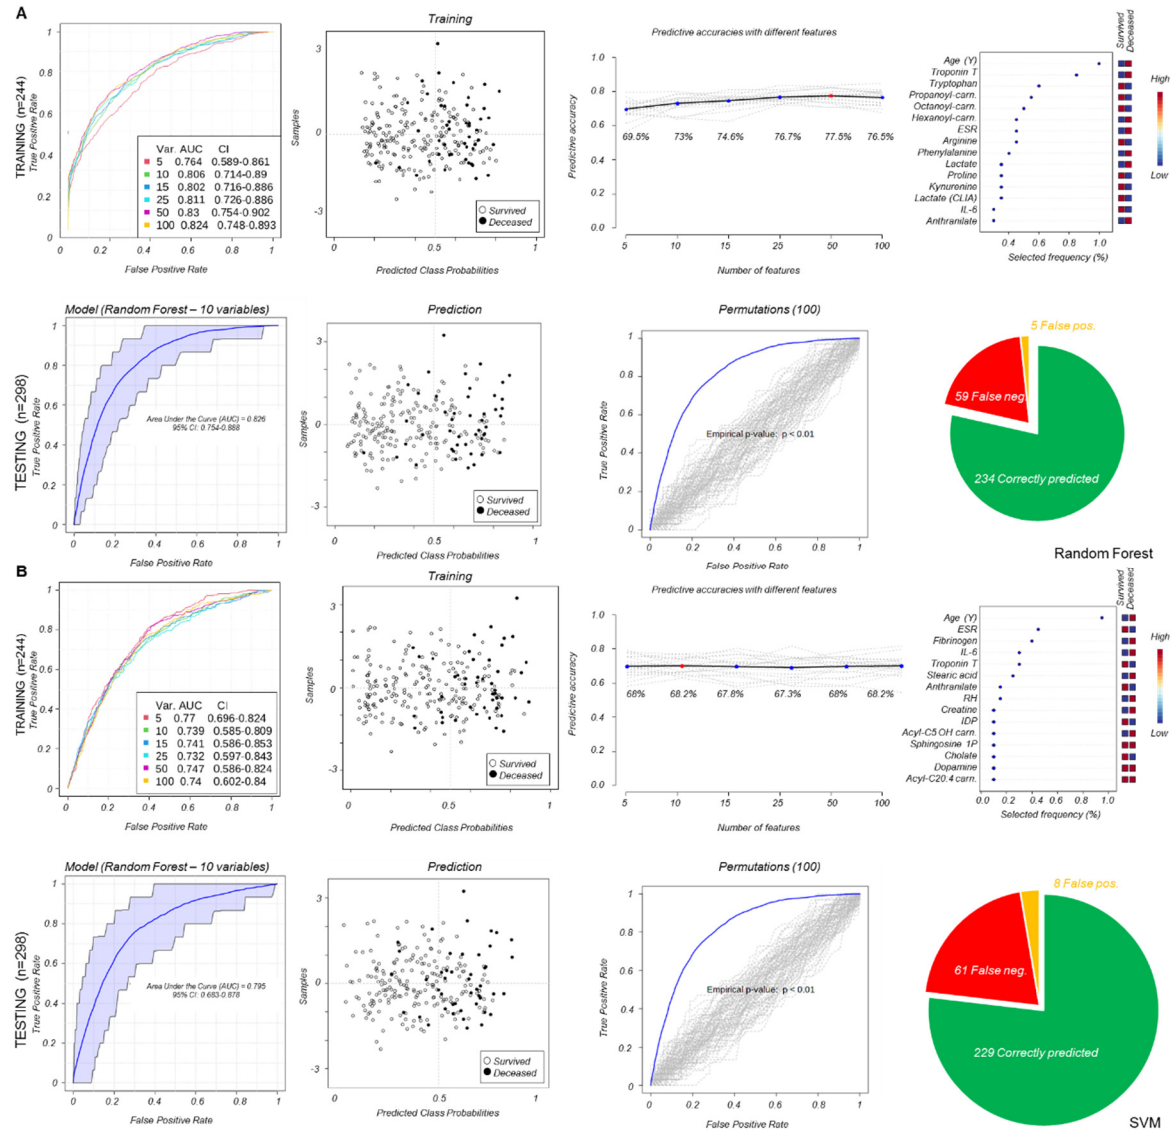

**Supplementary Figure S10– Comparison of predictive models of mortality via Random Forest (A) and SVM (B) algorithms. Patients were curated for metabolomics, clinical, coagulation and inflammatory variables (total n = 542). The cohort was then divided in two groups, one for training (n = 244) and one for testing (n = 298) of the algorithm, which resulted to be ~78% and ~75% accurate, respectively.**

*Impact of being on ventilator*

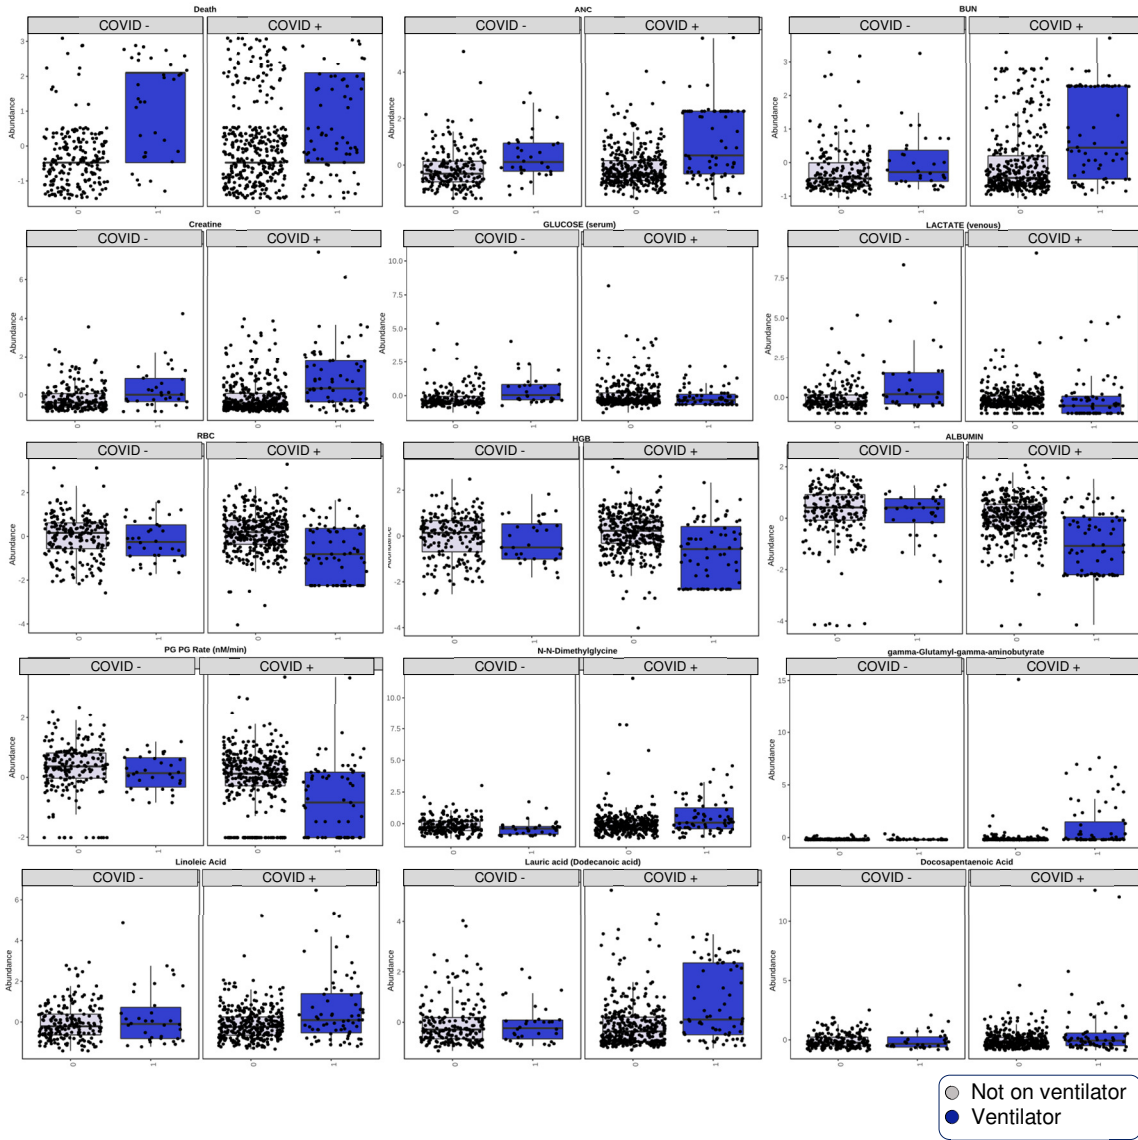

**Supplementary Figure S11 – Markers of ventilators in COVID negative (-) and positive (+) patients, as determined by Two-way ANOVA (0 = not on ventilator; 1 = on ventilator).**

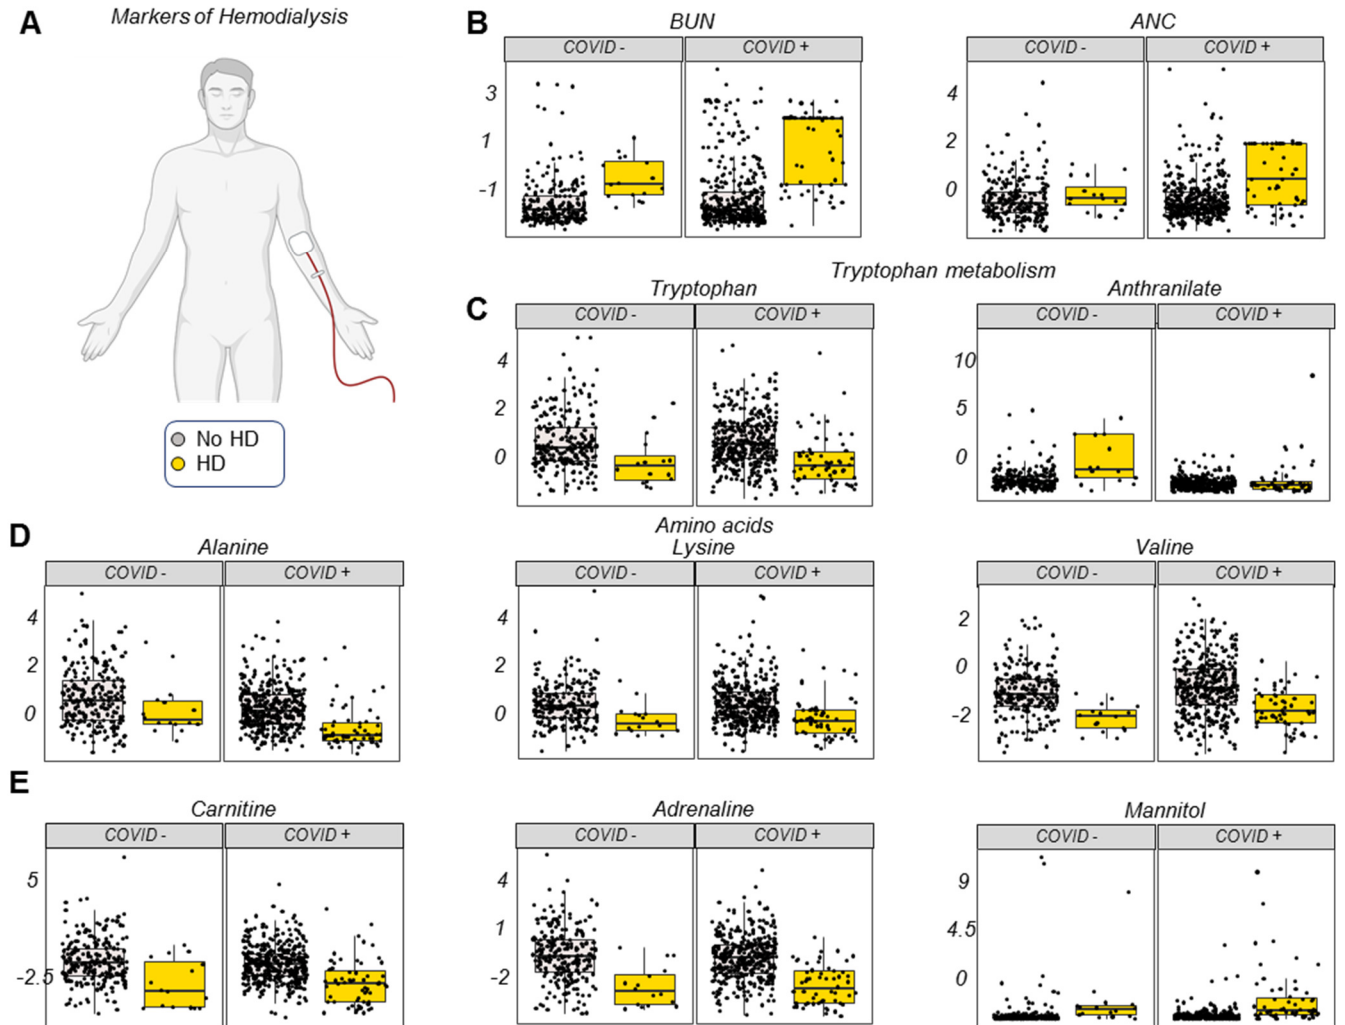

**Supplementary Figure S12 – Markers of hemodialysis (without clotting) in COVID negative (-) and positive (+) patients, as determined by Two-way ANOVA (0 = no hemodialysis; 1 = on hemodialysis).**

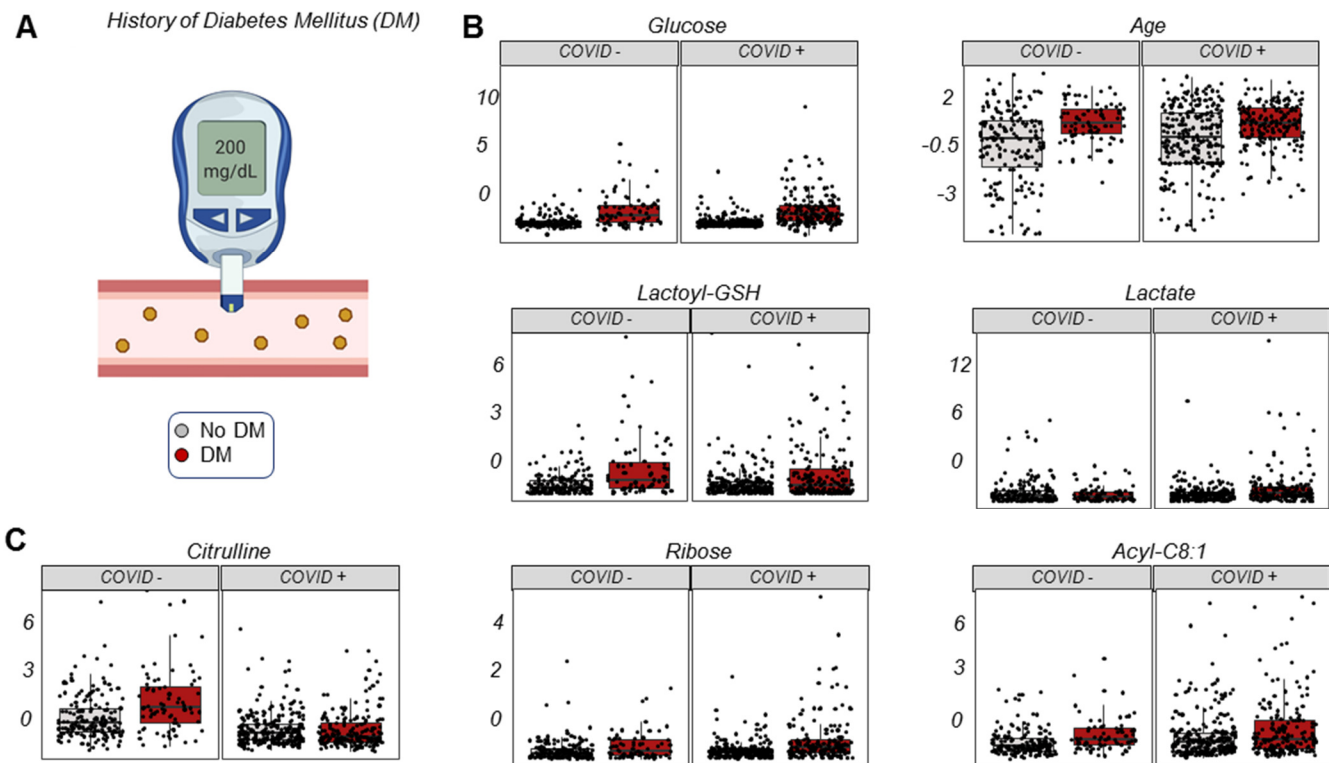

**Supplementary Figure S13 – Impact of pre-existing conditions such as diabetes in COVID negative (-) and positive (+) patients, as determined by Two-way ANOVA (0 = no history of diabetes; 1 = diabetes).**



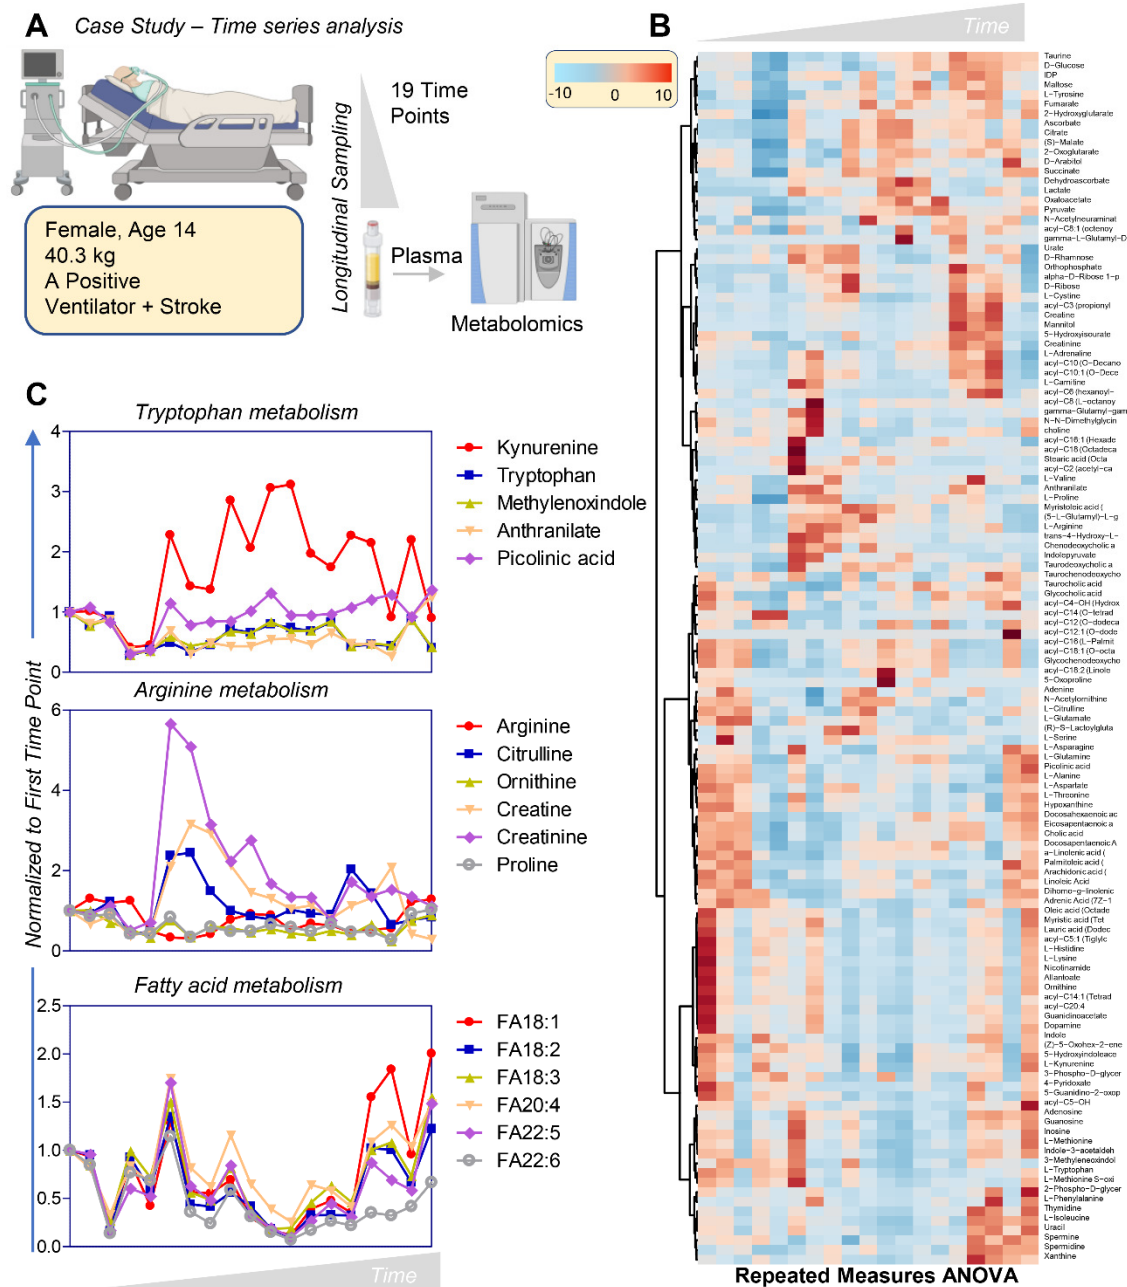

Supplementary Figure S15 – Time course analysis of a critically ill patient who survived (vectorial version of in manuscript figure).

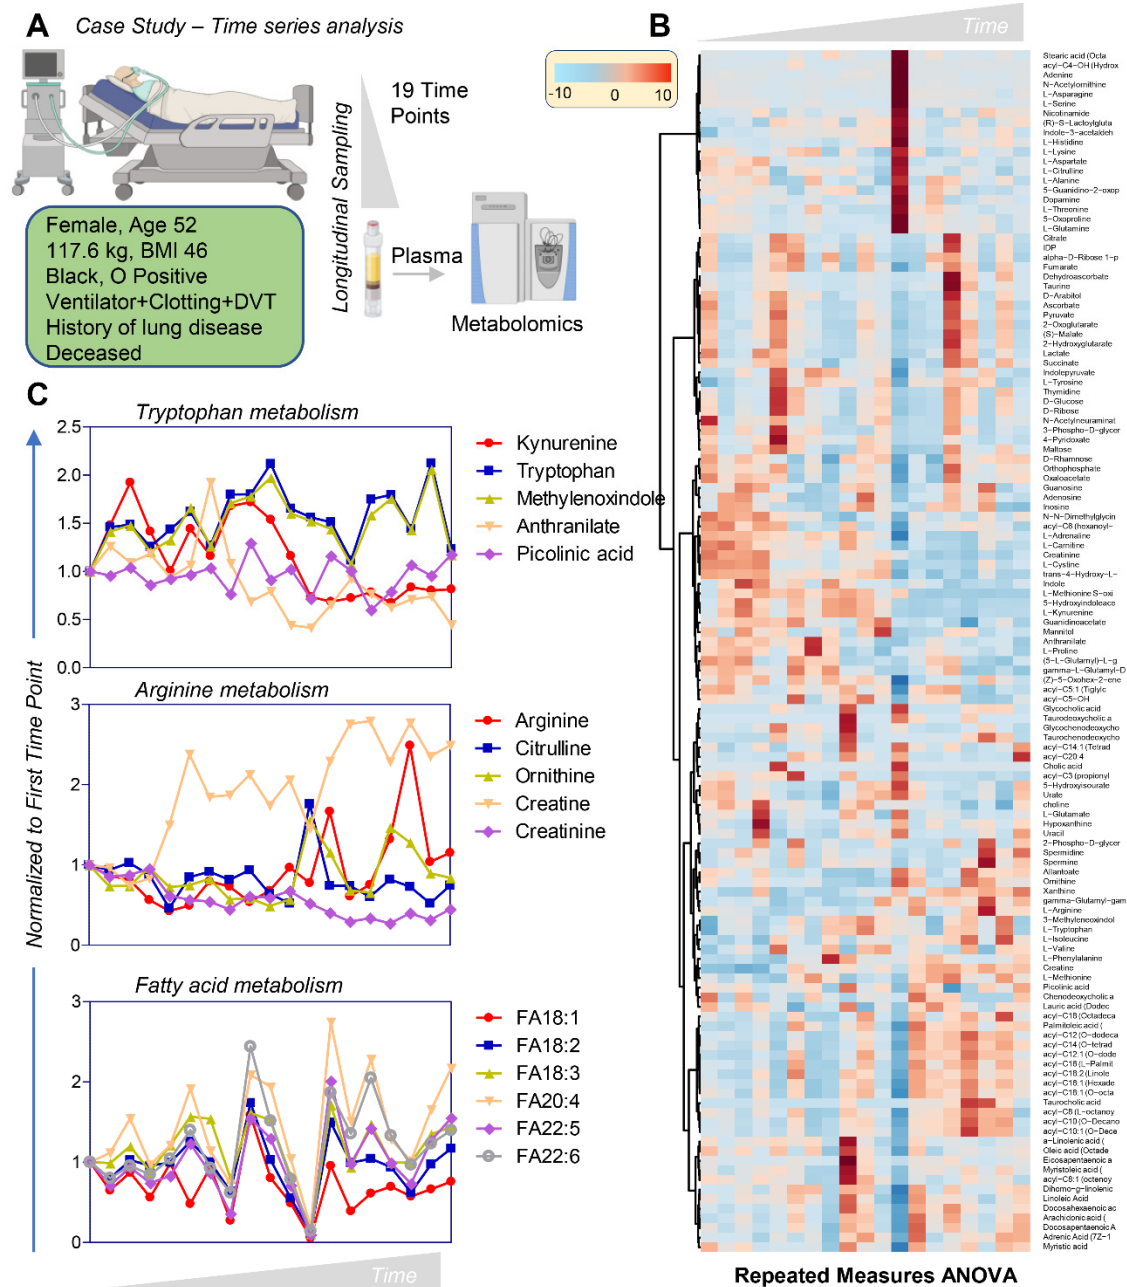

Supplementary Figure S16 – Time course analysis of a critically ill patient who died (vectorial version of in manuscript figure).
